# Supplementary material
Source: Frontiers journal article supplement (https://www.frontiersin.org/articles/216855)
Supplement: Image_2.PDF [file Image_2.PDF]

## Supplementary Figure 2

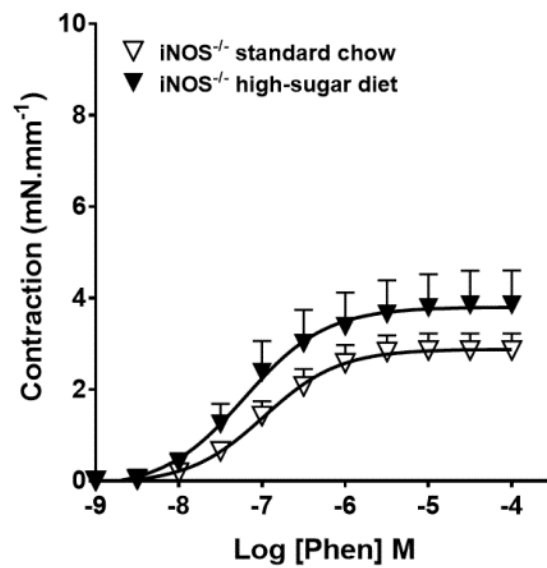

**Supplementary figure 2** – Contractile response to phenylephrine (Phen) in iNOS knockout animals (iNOS<sup>-/-</sup>) fed with standard chow or high-sugar diet. Data represent mean  $\pm$  SEM,  $n = 7$ .
