# Supplementary material
Source: Frontiers journal article supplement (https://www.frontiersin.org/articles/216855)
Supplement: Image_3.PDF [file Image_3.PDF]

**A**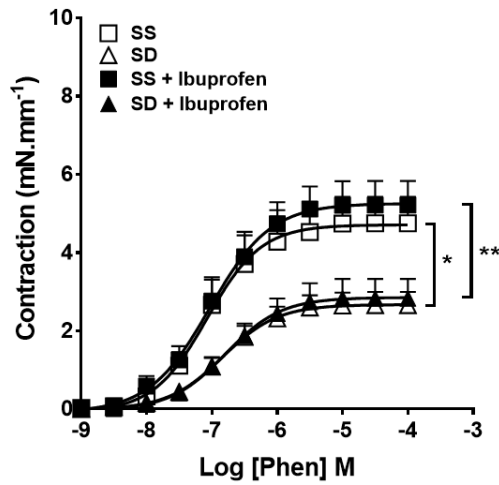**B**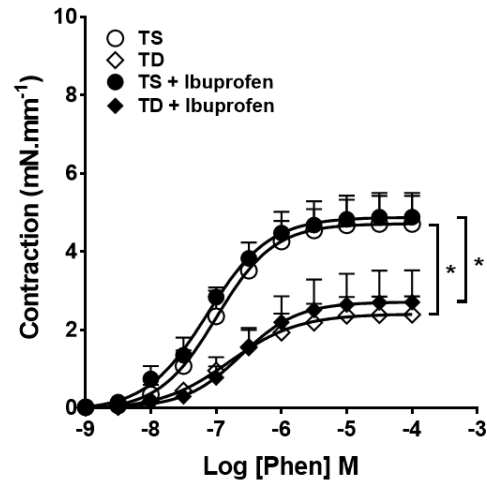

**Supplementary figure 3** - Contractile response to phenylephrine (Phen) in the absence or presence of ibuprofen (10  $\mu$ M) in aortic rings of sedentary (A) and trained groups (B). Data represent mean  $\pm$  SEM,  $n = 6$ . Differences in maximal contractions are shown in concentration-response curves. \* $p < 0.05$  and \*\* $p < 0.01$ , two-way ANOVA with Tukey *post hoc* test. SS: sedentary + standard chow group; SD: sedentary + high-sugar diet group; TS: trained + standard chow group; TD: trained + high-sugar diet group.
